# Supplementary material for: A green chemical approach for preparation of PtxCuy nanoparticles with a concave surface in molten salt for methanol and formic acid oxidation reactions
Source: Royal Society of Chemistry journal article supplement (doi:10.1039/c2jm15792f), 2012-01-01
Supplement: c2jm15792f.pdf [file c2jm15792f.pdf]

## Supporting Information

### **A Green Chemical Approach for Preparation of Pt<sub>x</sub>Cu<sub>y</sub> Nanoparticles with a Concave Surface in Molten Salt for Methanol and Formic Acid Oxidation Reaction**

*Haidong Zhao,<sup>a,b</sup> Chengzhang Yu,<sup>a</sup> Hongjun You,<sup>a</sup> Shengchun Yang,<sup>\*a</sup> Yong Guo,<sup>\*b</sup> Bingjun*

*Ding<sup>a</sup> and Xiaoping Song<sup>a</sup>*

*a* School of Science, State Key Laboratory for Mechanical Behavior of Materials, Ministry of Education Key Laboratory for Non-Equilibrium Synthesis and Modulation of Condensed Matter, Xi'an Jiaotong University, Xi'an 710049, Shann Xi, People's Republic of China

*b* School of Chemistry and Chemical Engineering, Shanxi Datong University, Datong 037009, Shanxi, People's Republic of China

\*Corresponding authors: Shengchun Yang (Email: ysch1209@mail.xjtu.edu.cn); Yong Guo (Email: ybsy\_g@263.net)

#### *Preparation of the Pt<sub>x</sub>Cu<sub>y</sub> alloy concave nanoparticles.*

The Pt<sub>51</sub>Cu<sub>49</sub> alloy concave nanoparticles were prepared as follows: 6.6 g of KNO<sub>3</sub> (Tianjin Hengxing Chemical Reagent, AR, 99.0%), 3.4 g of LiNO<sub>3</sub> (Aladdin Reagent, CR, 98.0%) were mixed together in a 50 mL three-neck round-bottom flask and slowly heated to 180 °C with magnetic stirring, 50 mg KOH (Tianjin Hengxing Chemical Reagent, AR, 85.0%) was adding into the molten salt solution. Then 8.8 mg of tetra-ammine platinum oxalate {Pt(NH<sub>3</sub>)<sub>4</sub>C<sub>2</sub>O<sub>4</sub>} and 6.1 mg of copper nitrate trihydrate {Cu(NO<sub>3</sub>)<sub>2</sub>·3H<sub>2</sub>O} (Tianjin Hongyan Chemical Reagent, AR, 99.0%) were added simultaneously into the flask with vigorously stirring. The reaction was kept at 180 °C for 2 h. The black molten salt solution was cooled down to room temperature by removing the heating bath, and then 50 mL distilled water was injected into the flask to dissolved the mixture with magnetic stirring. The solution was centrifuged at 5000 rpm for 2 min. After centrifuging, the transparent supernatant was collected for recycles and the precipitate was rinsed with distilled water for additional 2 times to remove the remained molten salt.

The other  $Pt_xCu_y$  nanocave alloy nanoparticles were using the same preparation method. 4.4 mg of  $Pt(NH_3)_4C_2O_4$  and 9.1 mg of  $Cu(NO_3)_2 \cdot 3H_2O$  for  $Pt_{23}Cu_{77}$ , 13.2 mg of  $Pt(NH_3)_4C_2O_4$  and 3.0 mg of  $Cu(NO_3)_2 \cdot 3H_2O$  for  $Pt_{74}Cu_{26}$ , 15.1 mg of  $Pt(NH_3)_4C_2O_4$  and 1.7 mg of  $Cu(NO_3)_2 \cdot 3H_2O$  for  $Pt_{83}Cu_{17}$ .

## FIGURES

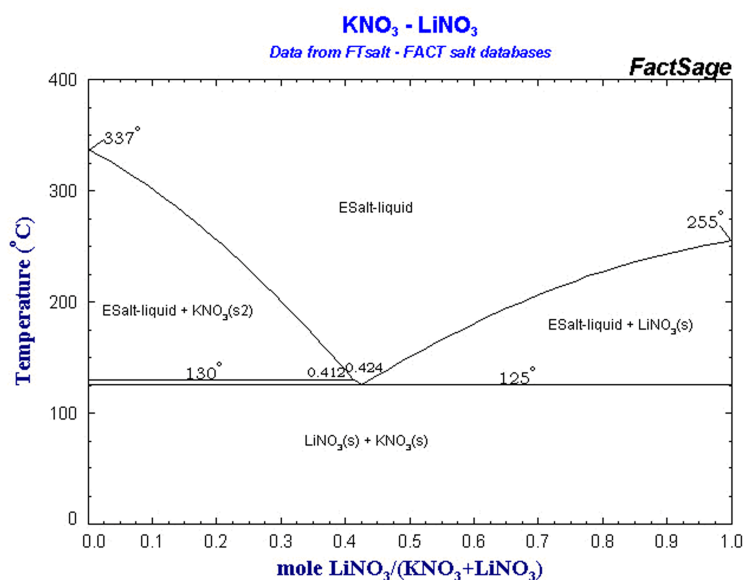

**Fig. S1** Diagram phase of the mixture of  $KNO_3$  and  $LiNO_3$ . Citing from internet:

[http://www.crct.polymtl.ca/fact/phase\\_diagram.php?file=KNO3-LiNO3.jpg&dir=FTsalt](http://www.crct.polymtl.ca/fact/phase_diagram.php?file=KNO3-LiNO3.jpg&dir=FTsalt)

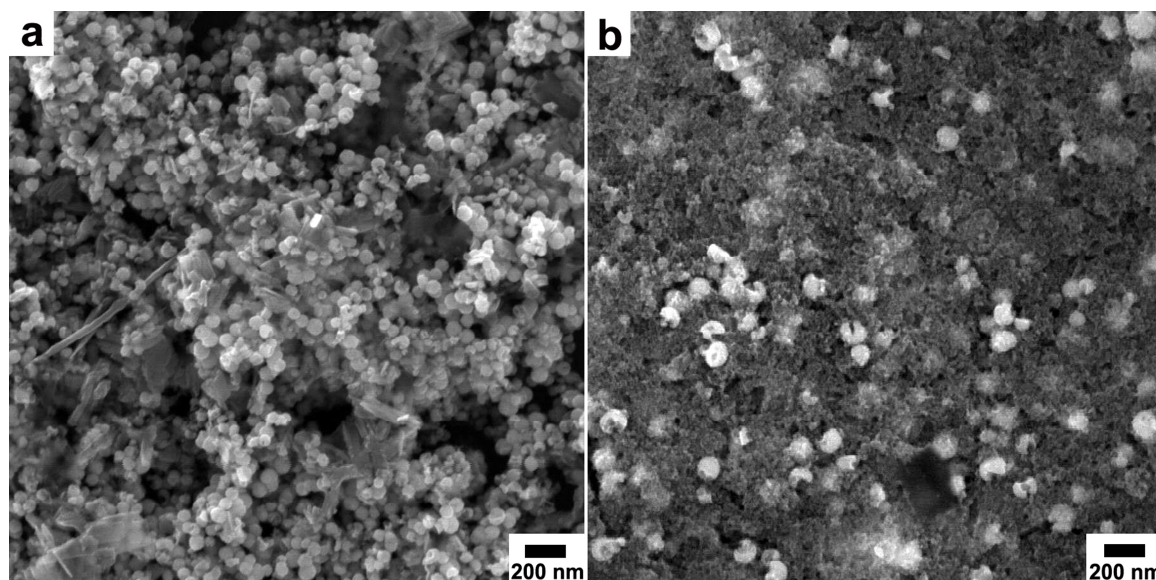

**Fig. S2** SEM images of the samples with high Cu molar feeding ratios, and the  $Pt(NH_3)_4C_2O_4$  / $Cu(NO_3)_2 \cdot 3H_2O$  feeding molar ratios were 1:3(a) and 1:6 (b), respectively.

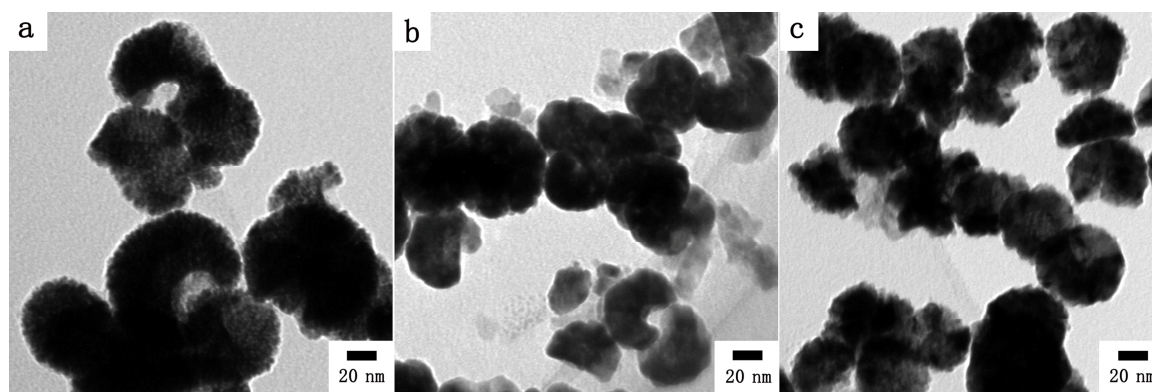

**Fig. S3** TEM images of the (a) Pt<sub>51</sub>Cu<sub>49</sub>, (b) Pt<sub>74</sub>Cu<sub>26</sub> and (c) Pt<sub>83</sub>Cu<sub>17</sub>.

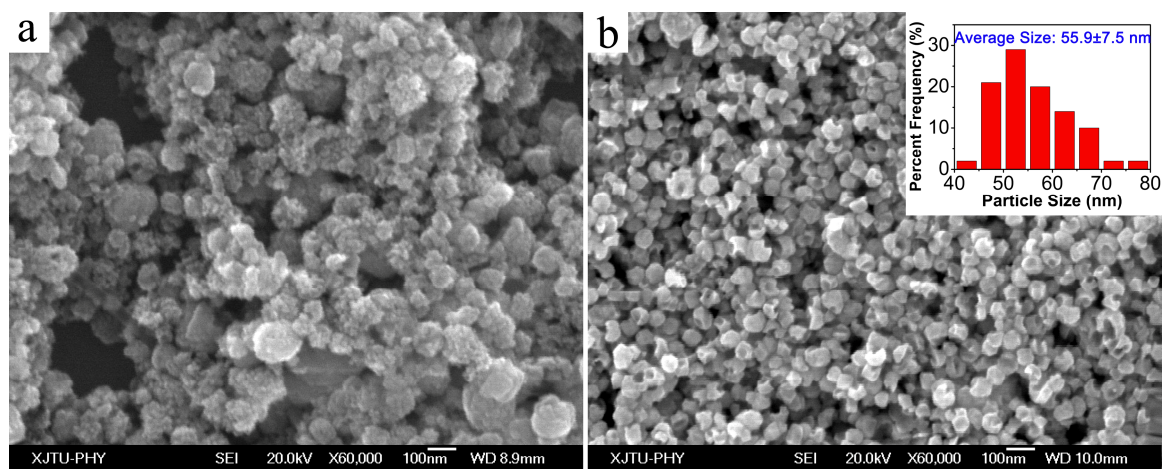

**Fig. S4** SEM images of the CuO (a) and Pt (b) synthesized in the KNO<sub>3</sub>-LiNO<sub>3</sub> molten salt system.

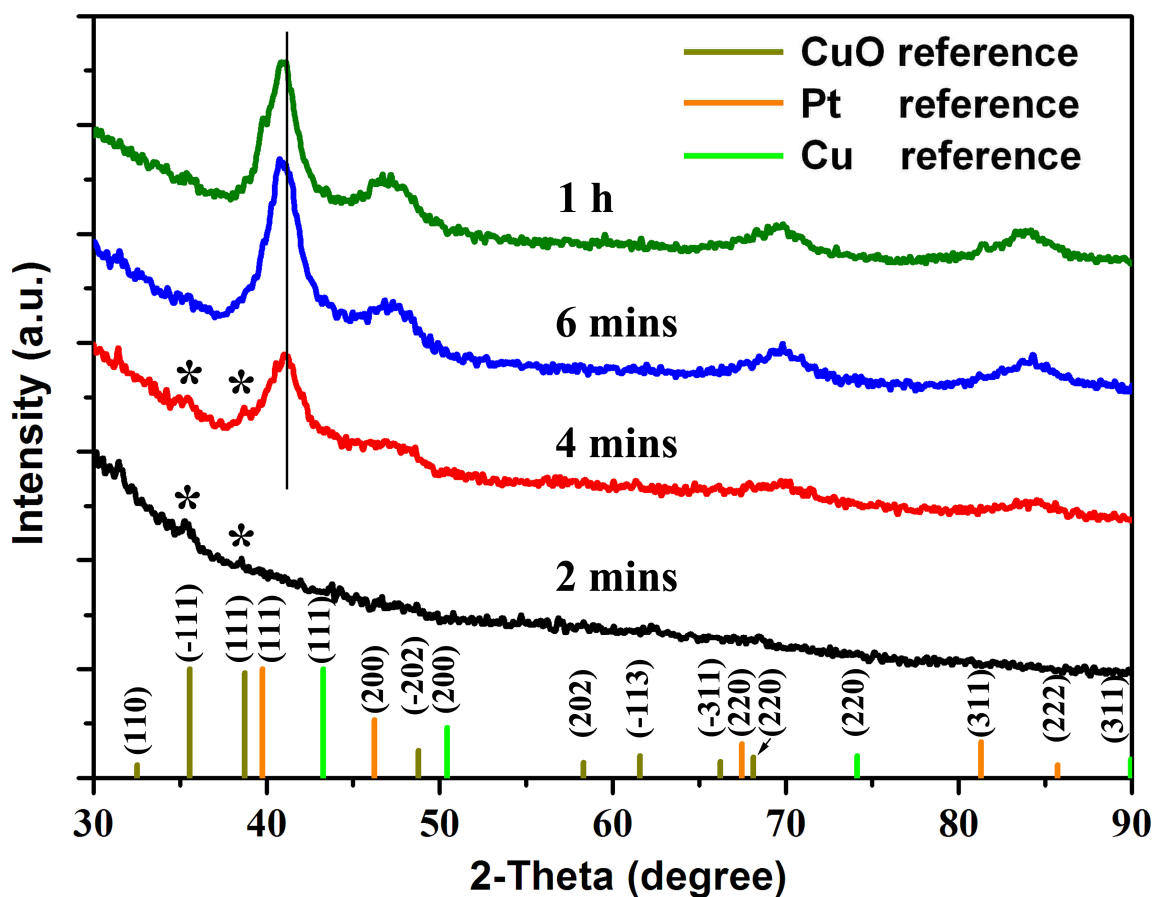

**Fig. S5** XRD patterns of the Pt-Cu nanocrystal samples synthesized under different reaction times. The reaction times are 2 mins, 4 mins , 6 mins and 1h, respectively.

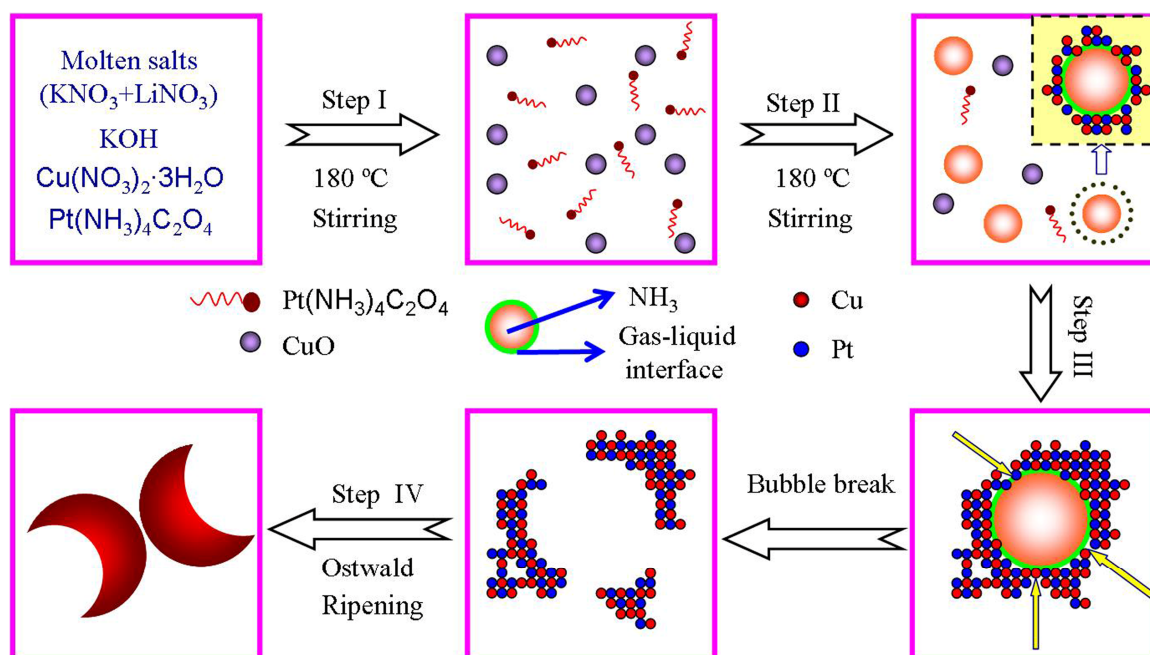

**Fig. S6** Schematic illustration of the formation of  $Pt_xCu_y$  alloy concave nanoparticles.

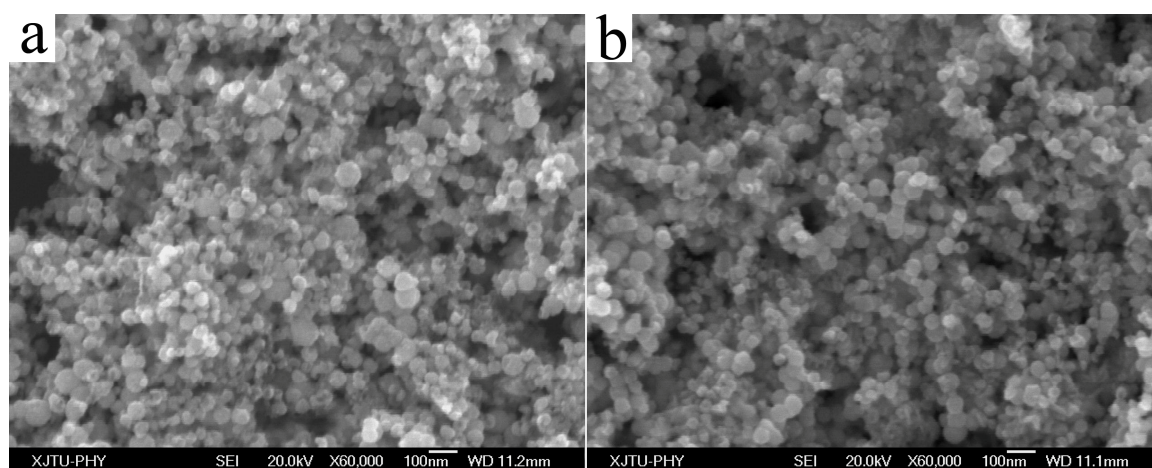

Fig. S7 SEM images of concave Pt-Cu NPs obtained at the temperature of 170 °C (a) and 190 °C (b).

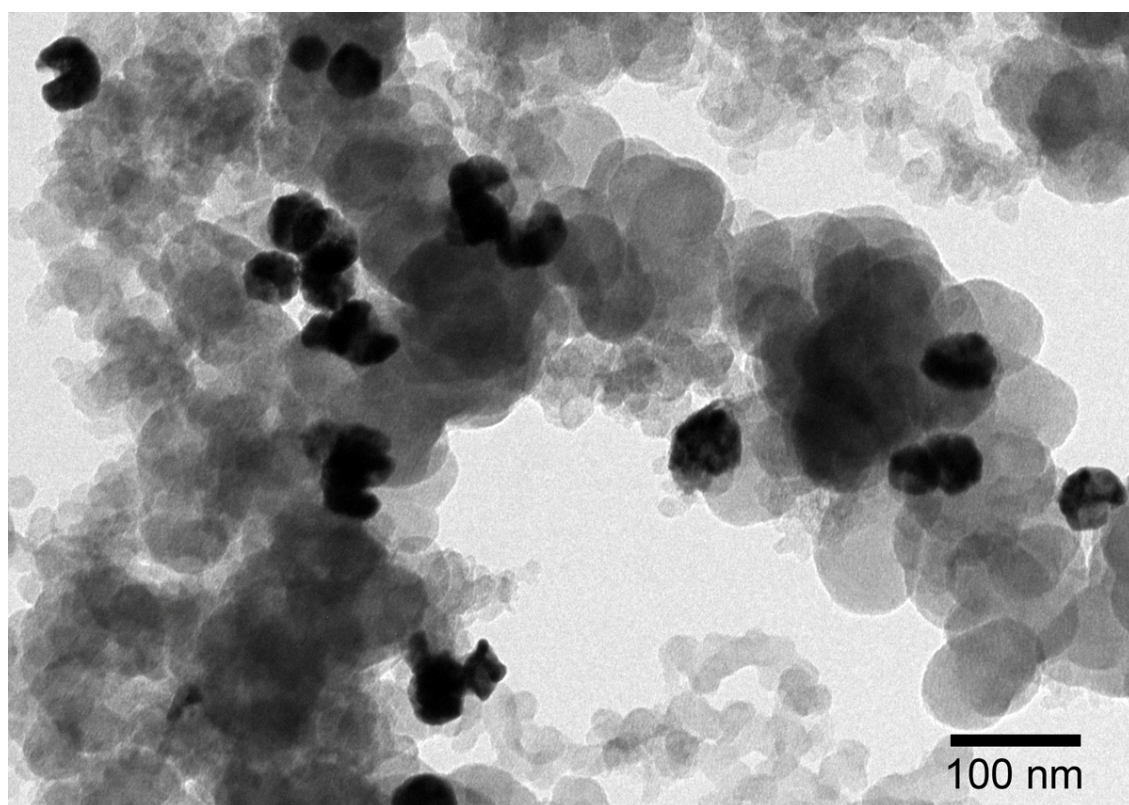

Fig. S8 TEM image of Pt<sub>74</sub>Cu<sub>26</sub> nanoparticles loaded on carbon black.

**Table S1** The summary of Pt/C (JM), Pt<sub>23</sub>Cu<sub>77</sub>/C, Pt<sub>51</sub>Cu<sub>49</sub>/C, Pt<sub>74</sub>Cu<sub>26</sub>/C, and Pt<sub>83</sub>Cu<sub>17</sub>/C catalysts for methanol electrooxidation in 0.1 M HClO<sub>4</sub> + 1 M MeOH

| Samples                                      | Pt/C (JM) | Pt <sub>83</sub> Cu <sub>17</sub> /C | Pt <sub>74</sub> Cu <sub>26</sub> /C | Pt <sub>51</sub> Cu <sub>49</sub> /C | Pt <sub>23</sub> Cu <sub>77</sub> /C |
|----------------------------------------------|-----------|--------------------------------------|--------------------------------------|--------------------------------------|--------------------------------------|
| <i>j</i> (mA/cm <sup>2</sup> <sub>Pt</sub> ) | 1.74      | 4.46                                 | 8.46                                 | 2.67                                 | 2.82                                 |
| Peak potentials (V)*                         | 0.88      | 0.82                                 | 0.84                                 | 0.84                                 | 0.85                                 |
| I <sub>f</sub> /I <sub>b</sub>               | 0.83      | 2.0                                  | 1.69                                 | 1.65                                 | 1.59                                 |

**Table S2** The summary of Pt/C (JM), Pt<sub>23</sub>Cu<sub>77</sub>/C, Pt<sub>51</sub>Cu<sub>49</sub>/C, Pt<sub>74</sub>Cu<sub>26</sub>/C, and Pt<sub>83</sub>Cu<sub>17</sub>/C catalysts for formic acid electrooxidation in 0.1 M HClO<sub>4</sub> + 0.5 M HCOOH

| Samples                                      | Pt/C (JM) | Pt <sub>83</sub> Cu <sub>17</sub> /C | Pt <sub>74</sub> Cu <sub>26</sub> /C | Pt <sub>51</sub> Cu <sub>49</sub> /C | Pt <sub>23</sub> Cu <sub>77</sub> /C |
|----------------------------------------------|-----------|--------------------------------------|--------------------------------------|--------------------------------------|--------------------------------------|
| <i>j</i> (mA/cm <sup>2</sup> <sub>Pt</sub> ) | 0.52      | 2.15                                 | 3.23                                 | 1.89                                 | 2.61                                 |
| Peak potentials (V)*                         | 0.51      | 0.55                                 | 0.56                                 | 0.62                                 | 0.59                                 |
